# Supplementary material for: A strategy for massively suppressing the shuttle effect in rechargeable Al–Te batteries
Source: Royal Society of Chemistry journal article supplement (doi:10.1039/d0qi00841a), 2020-01-01
Supplement: d0qi00841a1.pdf [file d0qi00841a1.pdf]

## Supporting Information

### **A strategy for massively suppressing the shuttle effect in rechargeable Al-Te battery**

Xuefeng Zhang, Jiguo Tu,\* Mingyong Wang, Shuqiang Jiao\*

State Key Laboratory of Advanced Metallurgy, University of Science and Technology

Beijing, Beijing 100083, P. R. China.

\*E-mail: guo15@126.com (J. Tu), sjiao@ustb.edu.cn (S. Jiao)

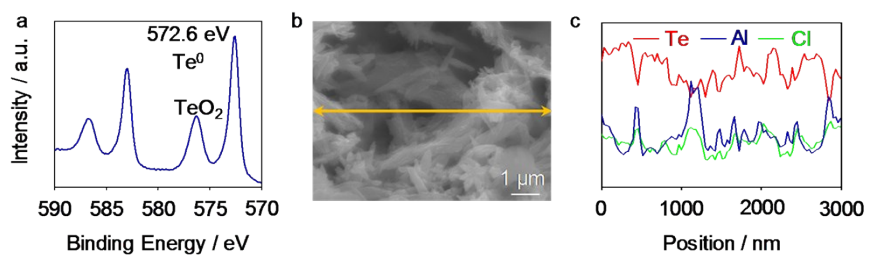

**Fig. S1. The characteristic of chemical reaction product.** (a) XRD pattern; (b) The SEM

image with (c) linear-scanning EDS.

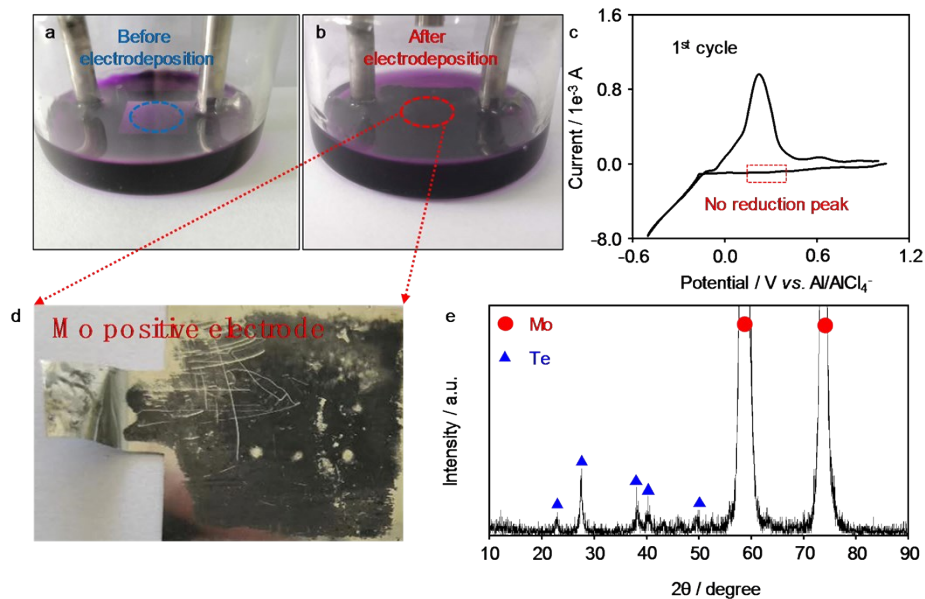

**Fig. S2. The electrochemical behavior measurement of soluble ions and the characteristic of electrodeposition product.** (a,b) The bottled battery assembled with dissolved electrolyte, Al negative electrode and Mo positive electrode; (c) The first cycle of CVs at voltage range of -0.5 V-1.0 V; (d,e) The photo and XRD pattern of Mo positive electrode after electrodeposition.

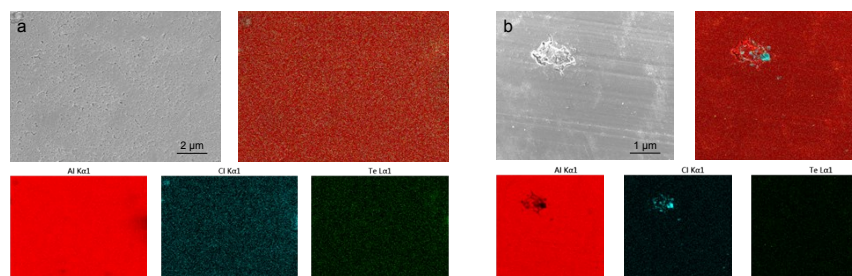

**Fig. S3. The SEM images with EDS of Al negative electrode after long cycling. (a)**

Al|GF/A|Te, (b) Al|AB-PVDF-MS|Te.

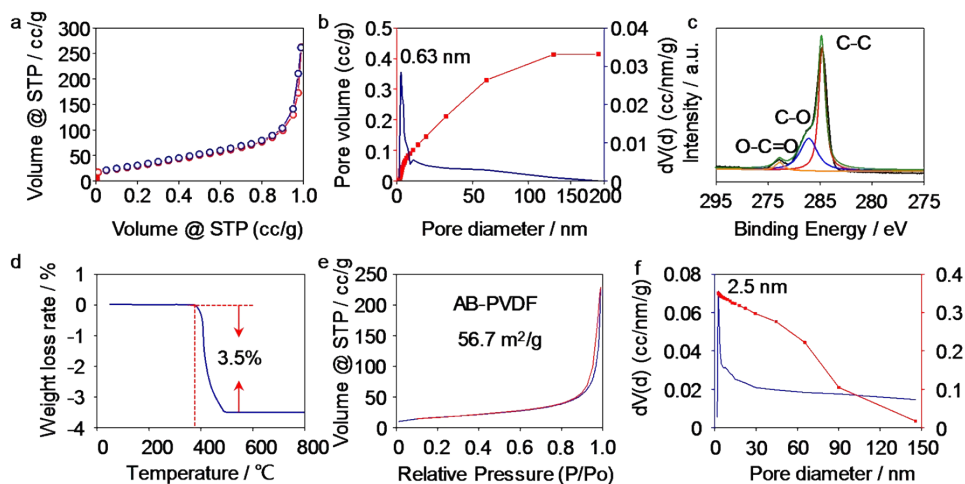

**Fig. S4. The characterization of AB and AB-PVDF.** (a,b) the BET measurement and corresponding pore size distribution of acetylene black (AB); (c) the XPS spectrum of AB; (d) TGA was carried out under nitrogen operated at a heating rate of 5 °C min<sup>-1</sup>; (e,f) the BET measurement and corresponding pore size distribution of AB-PVDF.

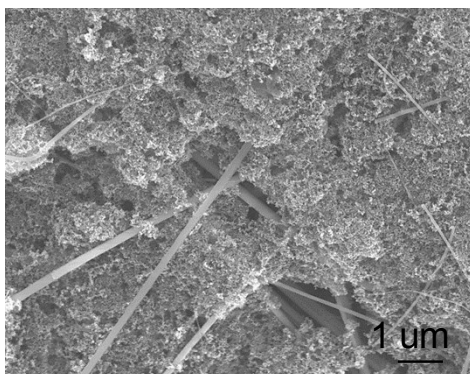

**Fig. S5. The SEM image of Acetylene black modified separator (AB-MS) after long-term charge/discharge cycling.**

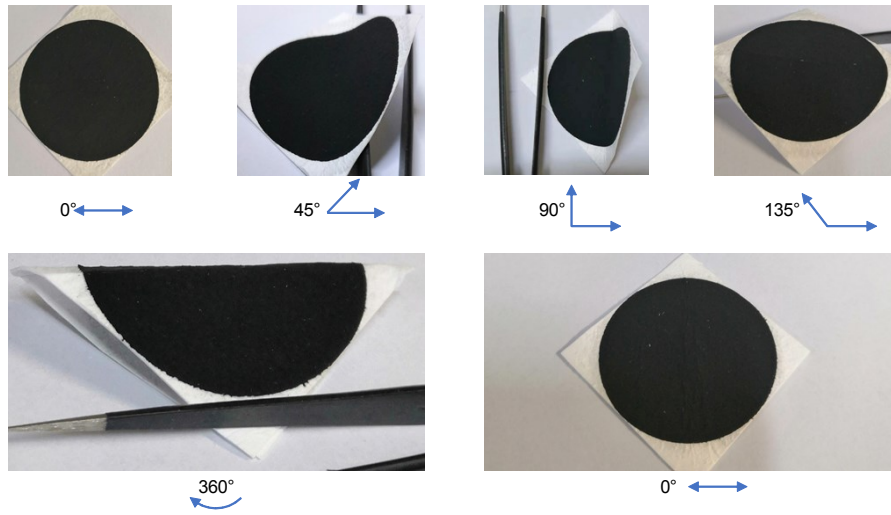

**Fig. S6. The Digital photos of AB-PVDF-MS was folded at different angles.**

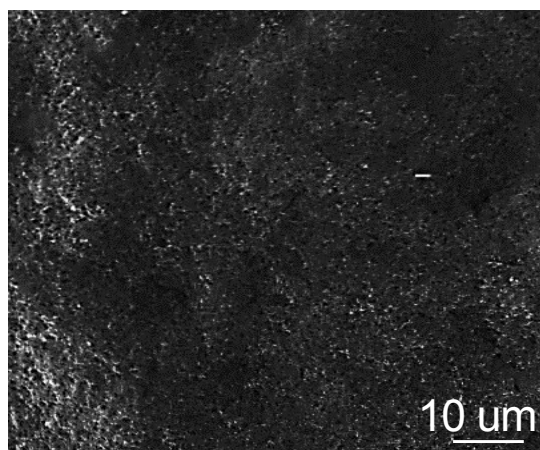

**Fig. S7.** The SEM image of AB-PVDF-MS from a top view.



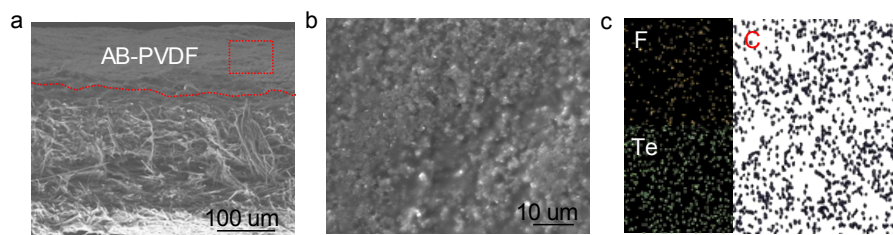

**Fig. S8.** The SEM and EDS images of AB-PVDF-MS after long-term cycling.

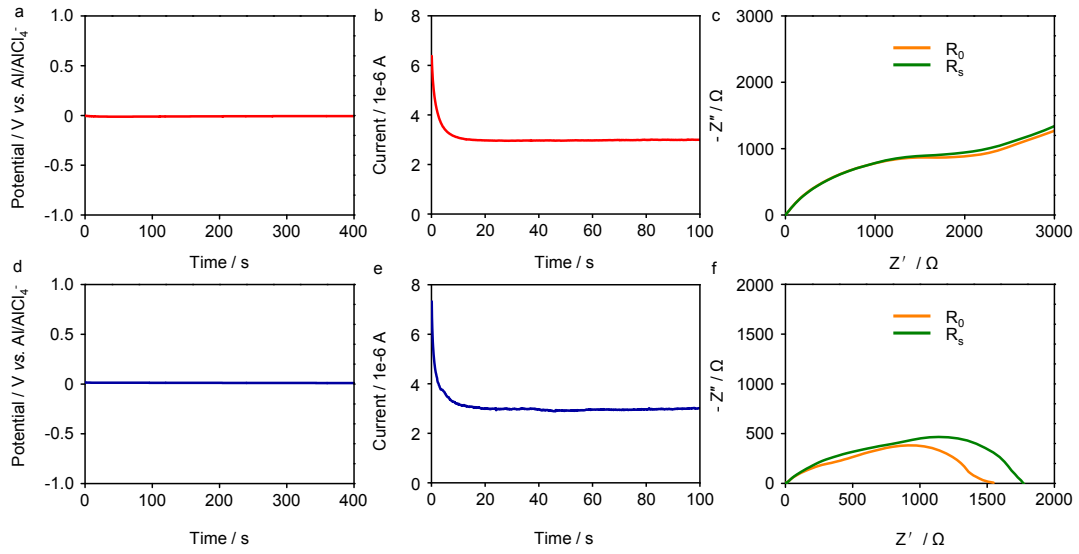

**Fig. S9.** The transference number ( $t_{anion}$ ) of conventional separator and AB-PVDF-MS. (a-c) open circuit potential, polarization curve and electrochemical impedance spectra; (d-f) the corresponding measurements for AB-PVDF-MS.

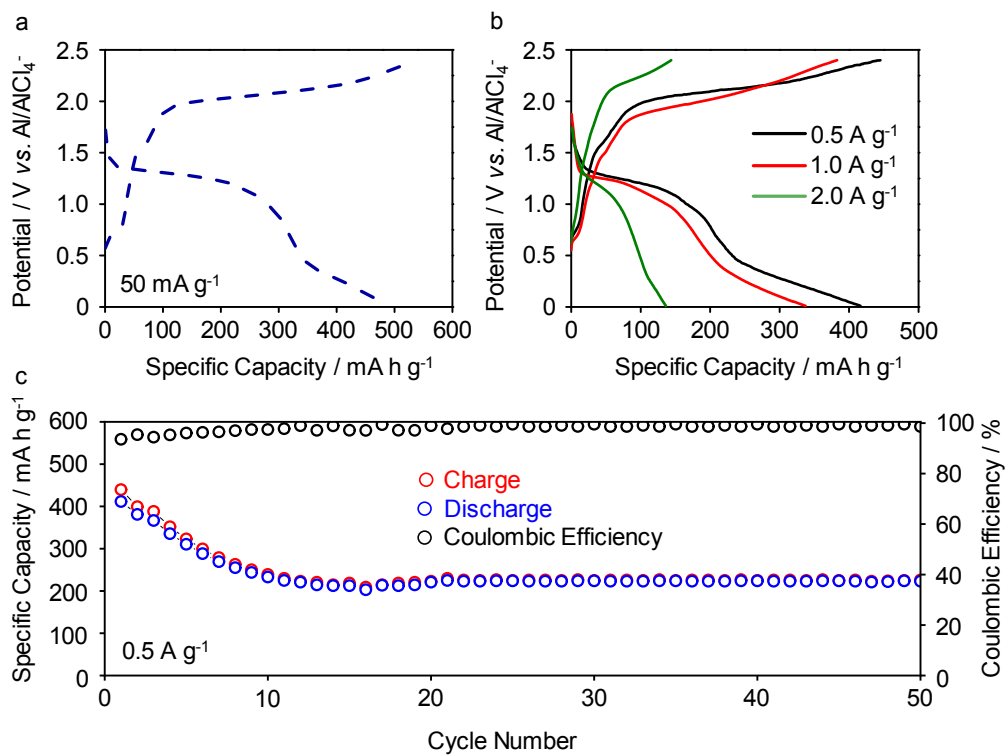

**Fig. S10.** the electrochemical performance of TABs with conventional separator. (a) the charge/discharge curves at a current density of  $50 \text{ mA g}^{-1}$ ; (b) the charge/discharge curves at different current density; (c) cycling performance at a current density of  $0.5 \text{ A g}^{-1}$ .

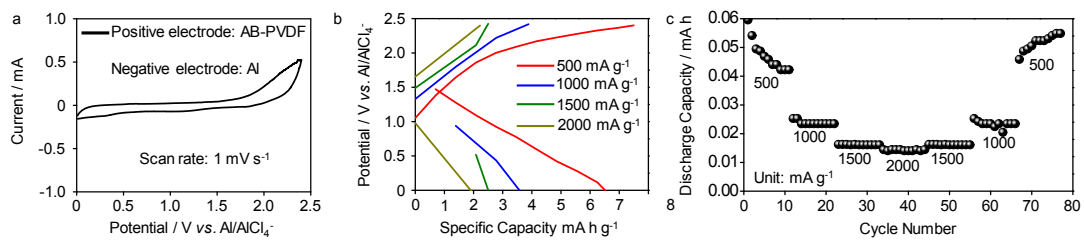

**Fig. S11. Electrochemical performance of AB-PVDF.** (a) the CVs; (b) The charge/discharge curves at different current density; (c) the rate performance.

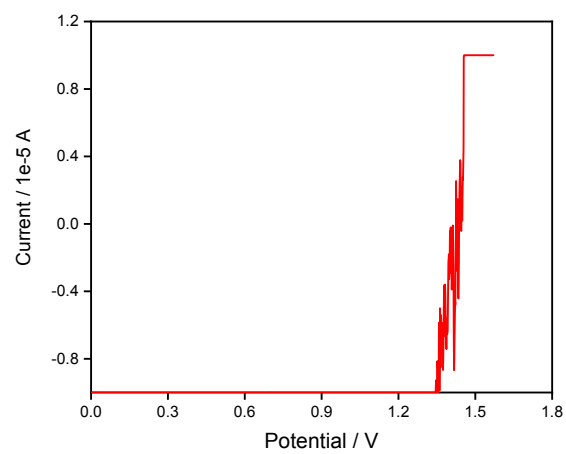

**Fig. S12 the LSV curves of AB-PVDF-MS.**

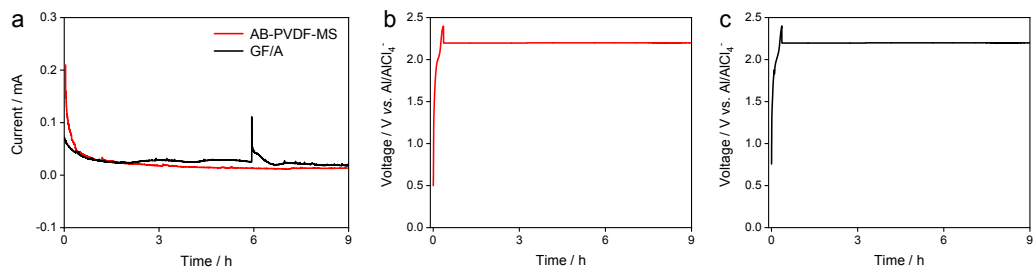

**Fig. S13.** (a) The self-discharge behaviors of Al|GF/A|Te and Al|AB-PVDF-MS|Te battery system by floating current analysis. (b,c) the corresponding v-t curves.

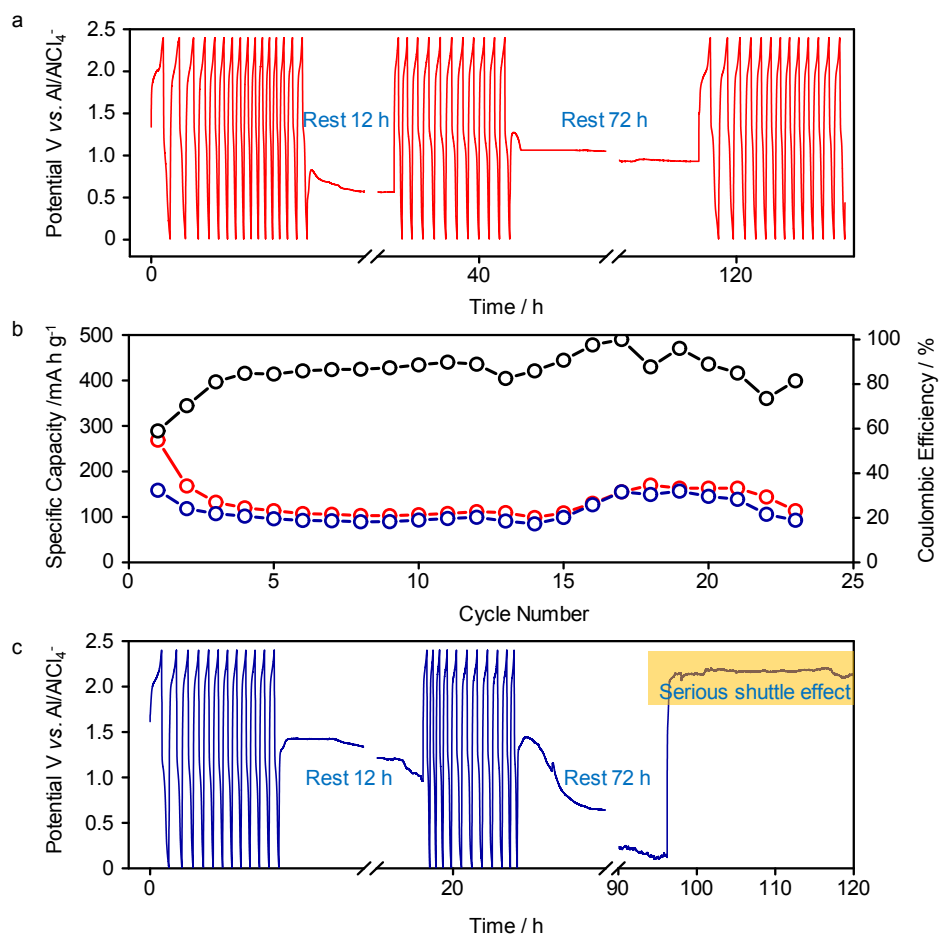

**Fig. S14.** the cycling performance with different rest time. (a) The potential vs. time curves with AB-PVDF-MS; (b,c) the cycling performance and potential vs. time curves with conventional separator.

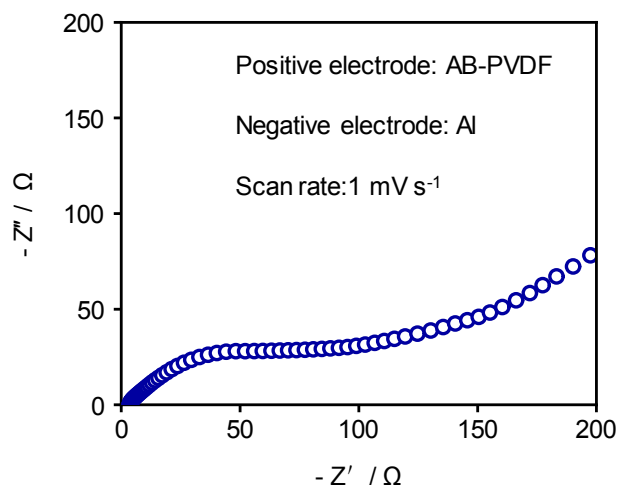

**Fig. S15. Electrochemical impedance spectra of AB-PVDF.**



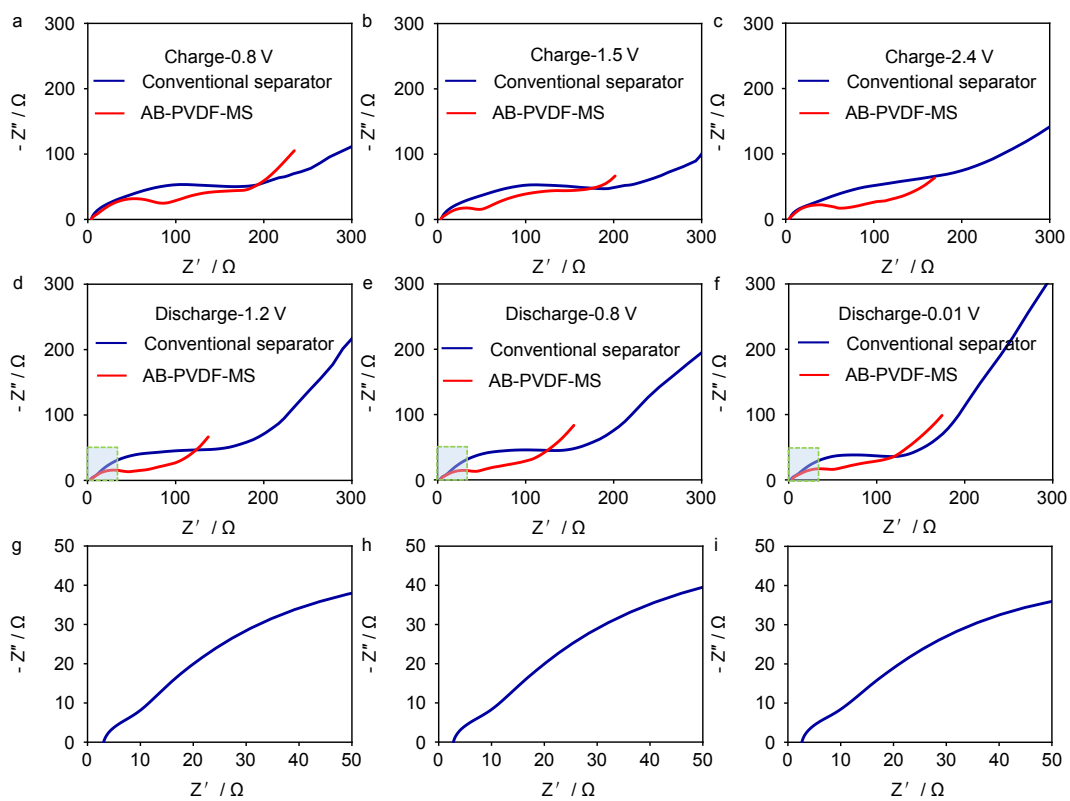

**Fig. S16.** the electrochemical impedance spectra of the TABs using AB-PVDF-MS, recorded at different potentials of charge and discharge. (a) charge-0.8 V; (b) charge-1.5 V; (c) charge-2.4 V; (d) discharge-1.2 V; (e) discharge-0.8 V and (f) discharge-0.01 V; (g-i) corresponds to a partial enlargement of (d-f).

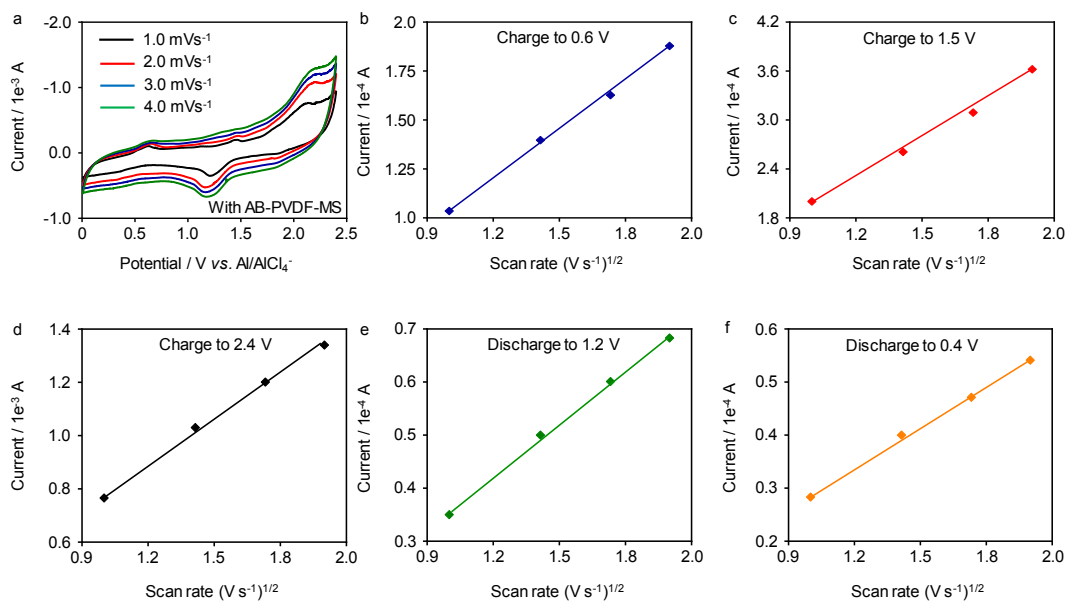

**Fig. S17. Cyclic voltammograms at different scan rates of TABs with AB-PVDF-MS and displayed a linear relationship between peak current and scanning rate. (a) The CVs at different scan rate; (b) charge-0.6 V; (c) charge-1.5 V; (d) charge-2.4 V; (e) discharge-1.2 V and (f) discharge-0.4 V.**
